# Supplementary material for: Quantum Mechanics Requires an Observer Context&nbsp;Distinguishing between Reality and its Mental &nbsp;Representation
Source: Preprints.org preprint supplement (doi:10.20944/preprints201802.0068.v1), 2018-02-08
Supplement: Supplementary file 1 [file supplementary]

**I.**

**real execution**

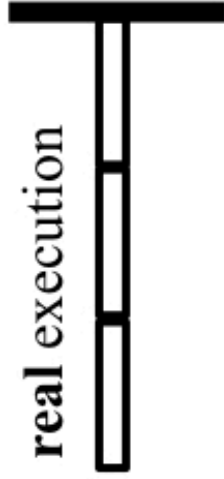

**limitation by:**

- starting conditions
- end conditions
- achievement of objectives
- physical forces

finite

**II.**

**partial virtual execution**

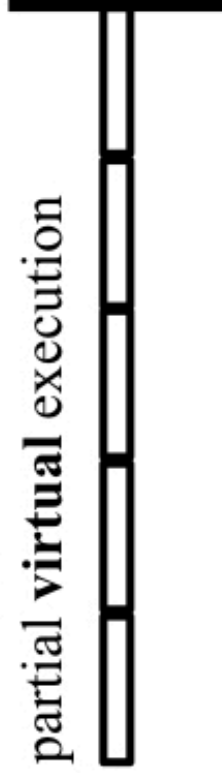

**limitation by:**

- achievement of objectives
- mental forces

finite

**III.**

**complete virtual if-then execution**

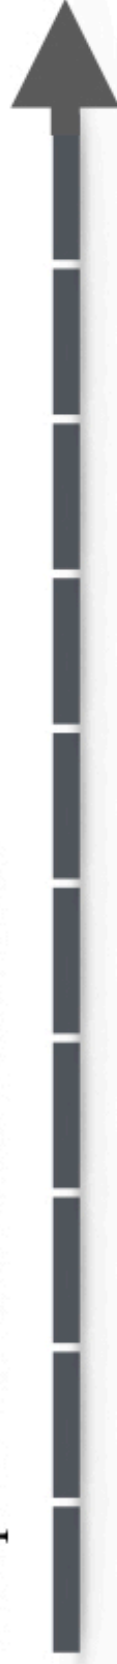

**no limitation:**

infinite
