# Supplementary material for: Quantum Mechanics Requires an Observer Context&nbsp;Distinguishing between Reality and its Mental &nbsp;Representation
Source: Preprints.org preprint supplement (doi:10.20944/preprints201802.0068.v1), 2018-02-08

## Physics

Theory of  
**everything**

Big Bang

Bio-cosm

Macro-cosm

QM

**Primacy :**  
formalism

dimension increase

## Bio-psychology

Knowledge on  
**proximate things**

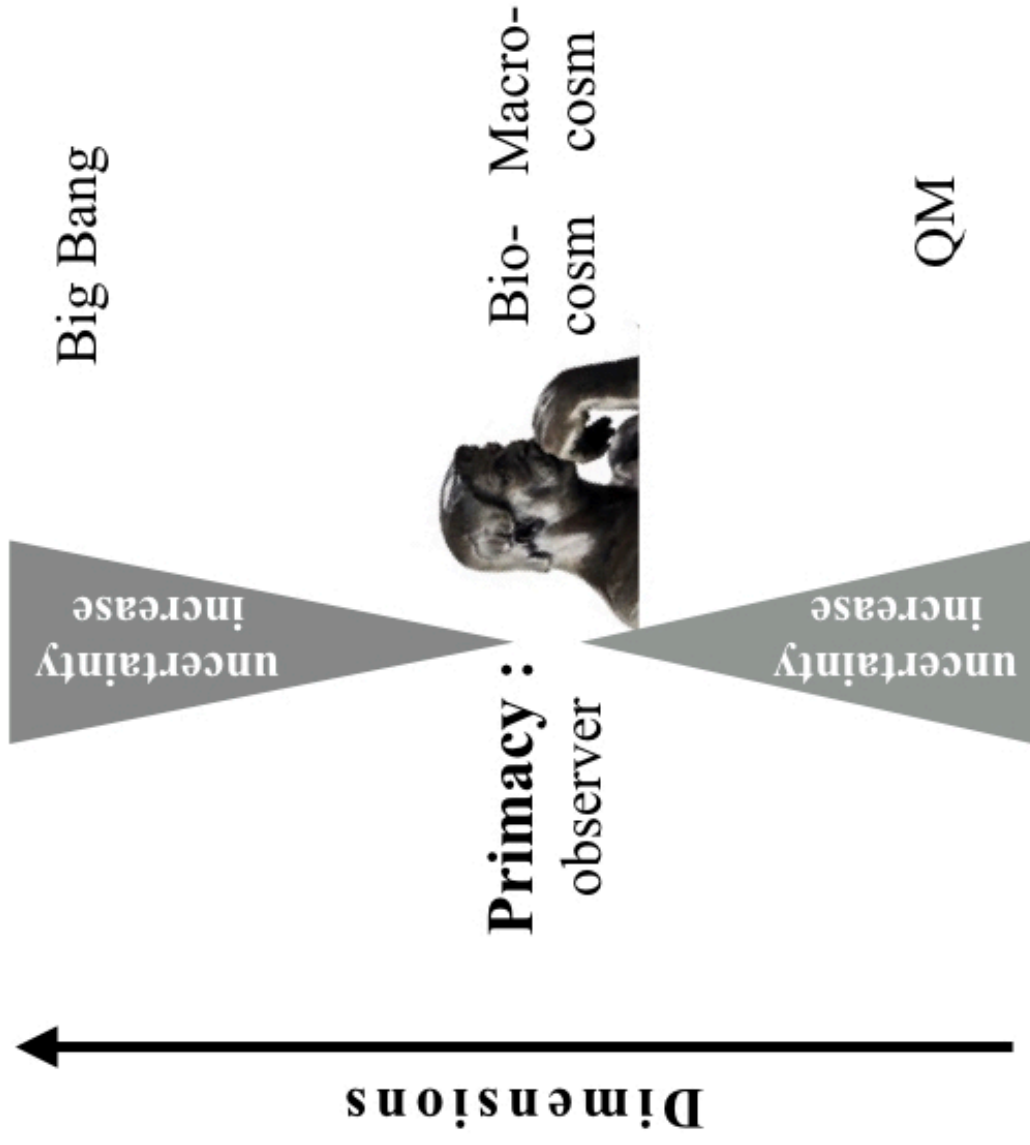

Supplement: Supplementary file 4 [file supplementary]
