# Supplementary material for: Quantum Mechanics Requires an Observer Context&nbsp;Distinguishing between Reality and its Mental &nbsp;Representation
Source: Preprints.org preprint supplement (doi:10.20944/preprints201802.0068.v1), 2018-02-08

extra-mental reality

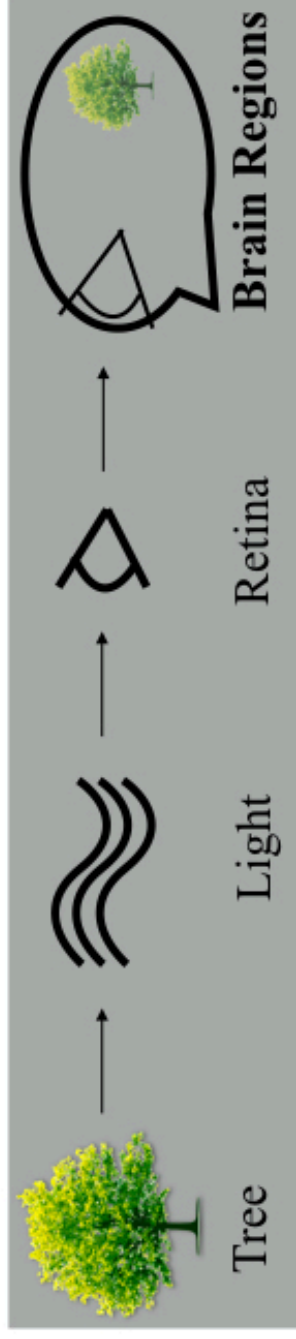

uninterrupted physical chains

**REALITY**

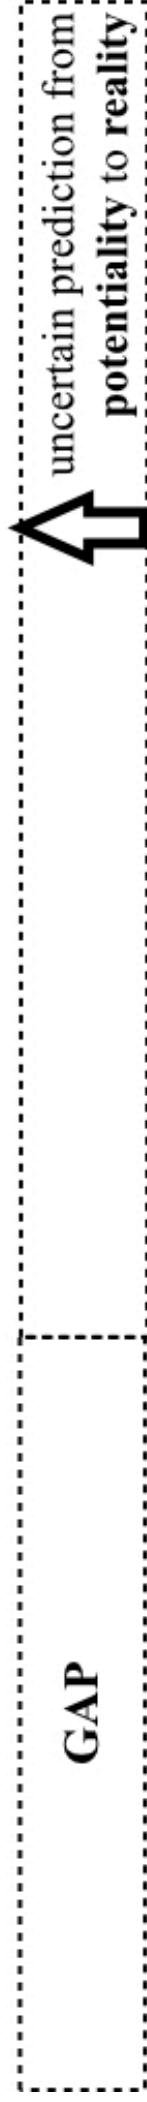

**POTENTIALITY**

**II.**  
**Memory imagery**  
(*no* sense organs)  
**Mental representation of**  
**PAST**

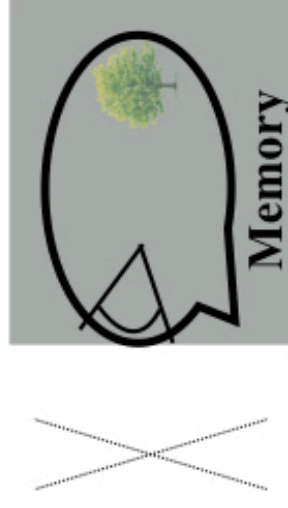

interrupted physical chains

**III.**  
**Abstract reflection**  
(*no* sense organs)  
**Mental representation of**  
**FUTURE**  
with rearranged past

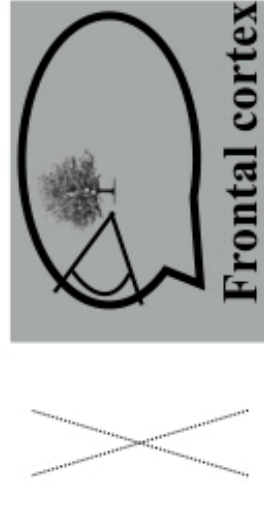

Supplement: Supplementary file 6 [file supplementary]
