# Supplementary material for: Quantum Mechanics Requires an Observer Context&nbsp;Distinguishing between Reality and its Mental &nbsp;Representation
Source: Preprints.org preprint supplement (doi:10.20944/preprints201802.0068.v1), 2018-02-08
Supplement: Supplementary file 8 [file supplementary]

## PHYSICS

no observer context

extra-mental **REALITY**

observable

**PHYSICAL  
FORMALISM :**

physical reality

**determinism**  
Classical physics

**indeterminism**  
QM:  
superposition,  
collapse,  
probability,

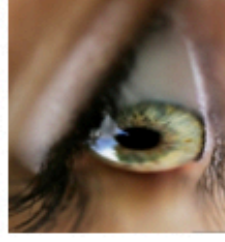

**Observation**

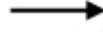

**Interpretation**

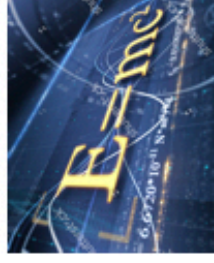

## BIO-PSYCHOLOGY

with observer context

extra-mental **REALITY**

with sense organs :

**“open system”**

*Reality-Potentiality Gap*

no sense organs :

**“closed system”**

**POTENTIALITY**

with  
probability models

mental representation

*Aerts: QM as  
hidden determinism*
